# Supplementary material for: Inhibition of SHP2 ameliorates the pathogenesis of systemic lupus erythematosus
Source: JCI journal article supplement (doi:10.1172/jci87037), 2016-05-15
Supplement: sd1 [file 1]

## **Supplemental Figures:**

Fig. S1. The SHP2 inhibitor 11a-1 is specific and reversible.

Fig. S2. Inhibition of SHP2 activity significantly improves kidney pathology in MRL/*lpr* mice.

Fig. S3. The SHP2 inhibitor specifically reduces the number of circulating DN T cells, but has no effect on red blood cells, platelets, monocytes, neutrophils, eosinophils, or basophils in MRL/*lpr* mice.

Fig. S4. SHP2 activity does not affect regulatory T cells in MRL/*lpr* spleens.

Fig.S5. The SHP2 inhibitor reduces inflammatory cell infiltration in MRL/*lpr* kidneys.

Fig. S6. The SHP2 inhibitor does not reduce IL-6, TNF $\alpha$  or IL-17A/A cytokine levels in MRL/*lpr* mice.

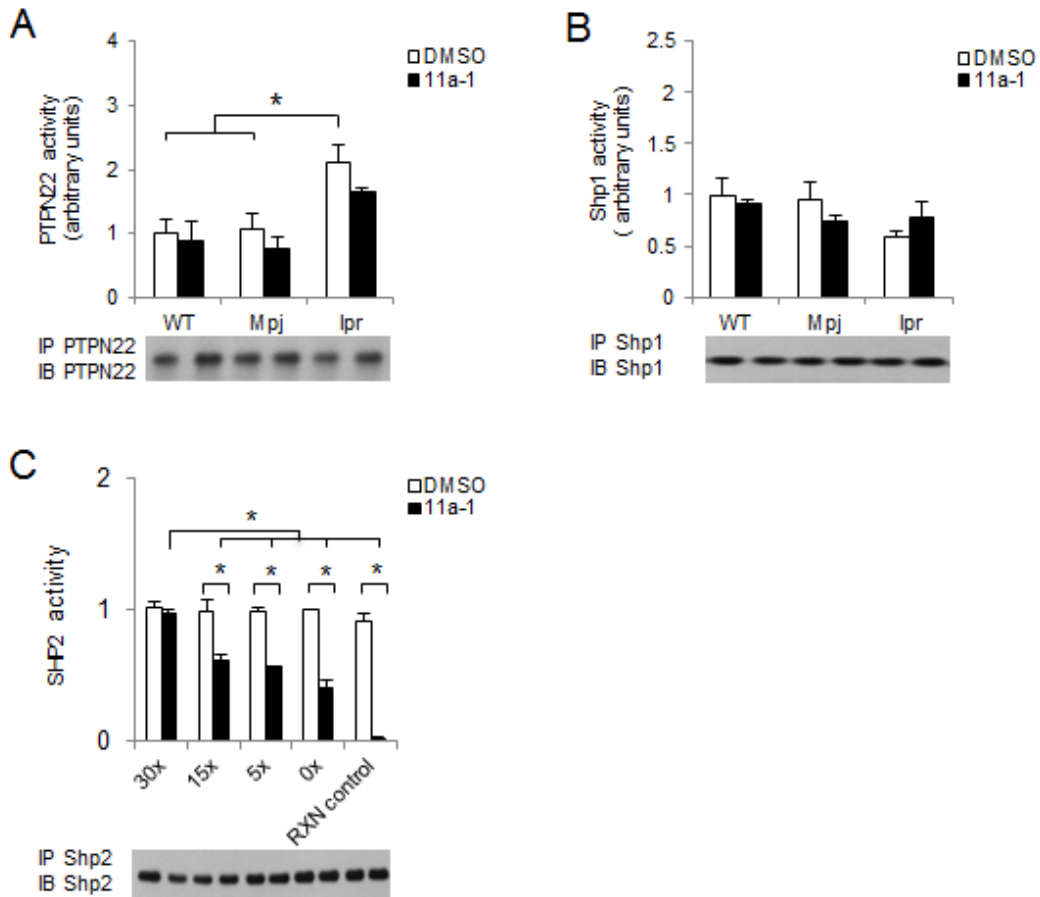

**Supplemental Figure 1. The SHP2 inhibitor 11a-1 is specific and reversible.** **A.** PTPN22 and **B.** SHP1 immune complex PTP assays were conducted using pNPP as a substrate on splenic lysates generated from 18 week-old WT, Mpj, and *lpr* female mice that were vehicle- or 11a-1-treated (7.5mg/kg/day) for 6 weeks, starting at 12 weeks of age. Immunoblot controls of immunoprecipitated PTPN22 or SHP1, showing comparable recovery respectively, are also shown. N=3-8 mice/group. **C.** SHP2 immune complexes from *lpr* splenic lysates were incubated *in vitro* with either 11a-1 (10µg/ml) or vehicle (DMSO) for 5 hours at 4°C, and then washed for the indicated number of times, to determine reversibility of the inhibitor. Immunoblot controls of immunoprecipitated SHP2 show comparable recovery. As a positive control for the reaction, SHP2 immune complexes were incubated directly with pNPP in reaction buffer. N=3 separate experiments; \*p<0.05. P values were derived from one-way or two-way ANOVA with Holm-Sidak post-test when ANOVA was significant.

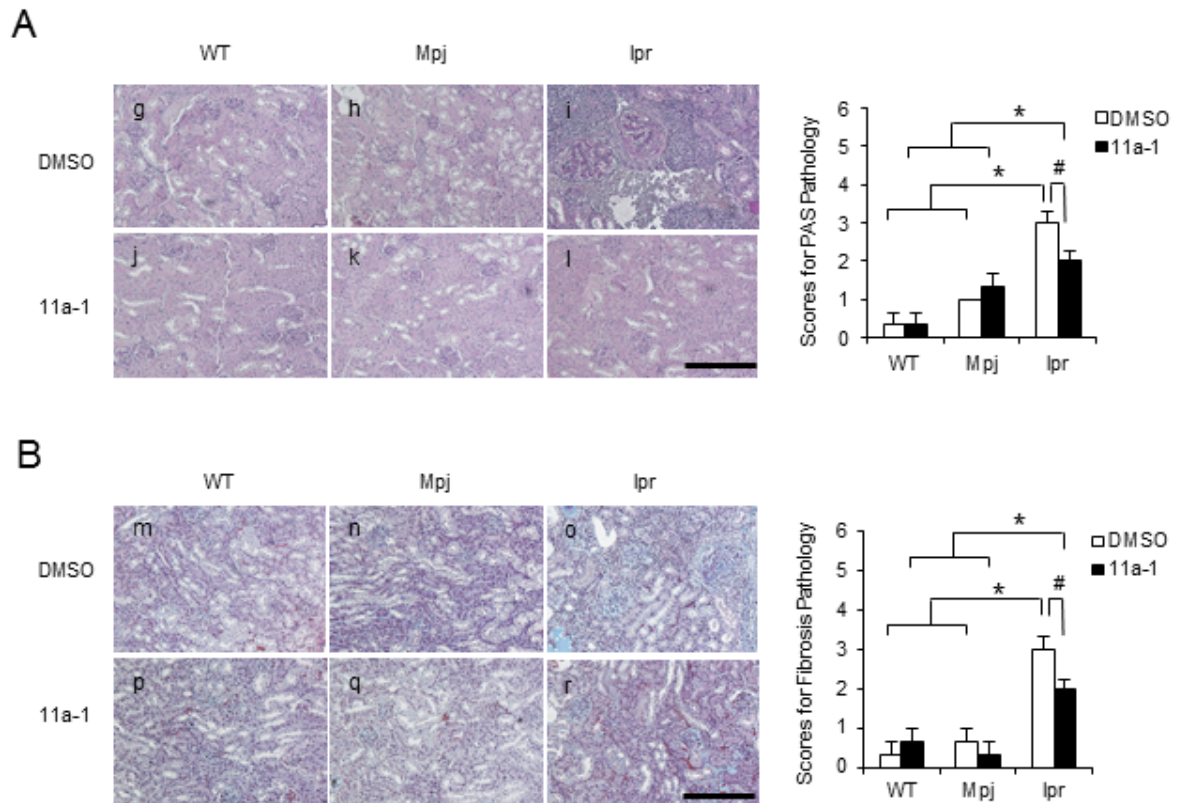

**Supplemental Figure 2. Inhibition of SHP2 activity significantly improves kidney pathology in MRL/lpr mice.** Representative **A**. PAS and **B**. Masson-trichrome-staining of kidney sections from 18 week-old WT, Mpj and lpr female mice treated for 6 weeks with vehicle or 11a-1 (7.5 mg/kg/day), with respective quantification of pathology scores indicated. \*,  $p < 0.01$ ; #,  $p < 0.05$ , where p values were derived from two-way ANOVA with Holm-Sidak post-test when ANOVA was significant. Scale bars: 500 $\mu$ m.

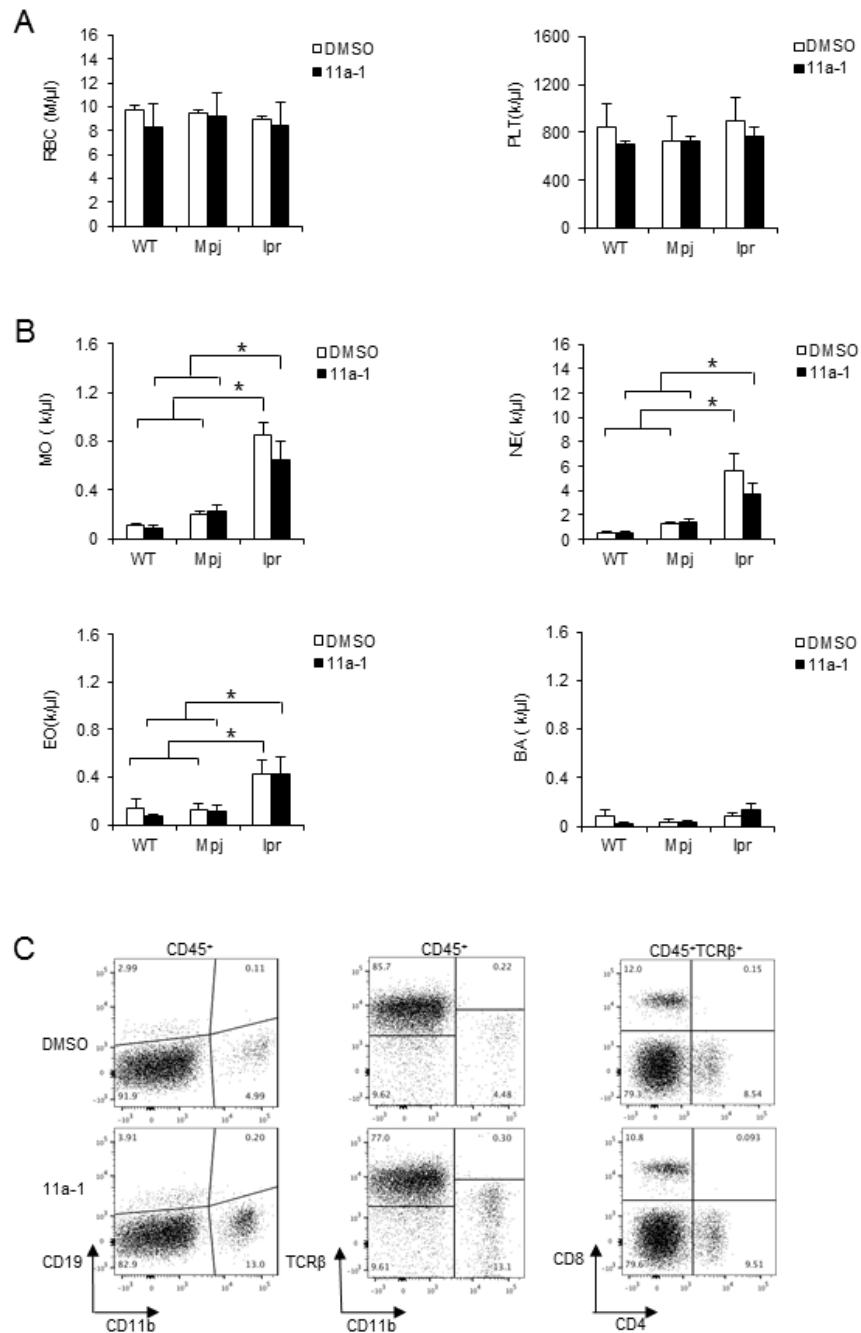

**Supplemental Figure 3. The SHP2 inhibitor specifically reduces the number of circulating DN T cells, but has no effect on red blood cells, platelets, monocytes, neutrophils, eosinophils, or basophils in MRL/lpr mice.** Total numbers of circulating **A.** red blood cells (RBCs), platelets and **B.** monocytes, neutrophils, eosinophils, and basophils in peripheral blood isolated from 18 week-old WT, Mpj and *lpr* female mice treated for 6 weeks with vehicle or SHP2 inhibitor (7.5 mg/kg/day). N=7-8 mice/group; **C.** Representative flow cytometry of B cells, T cells and the subset of T cells in peripheral blood collected from MRL/*lpr* mice treated for 6 weeks with vehicle or SHP2 inhibitor. N=4 mice/group. \*p<0.05, where p value are derived from two-way ANOVA with Holm-Sidak post-test when ANOVA was significant.

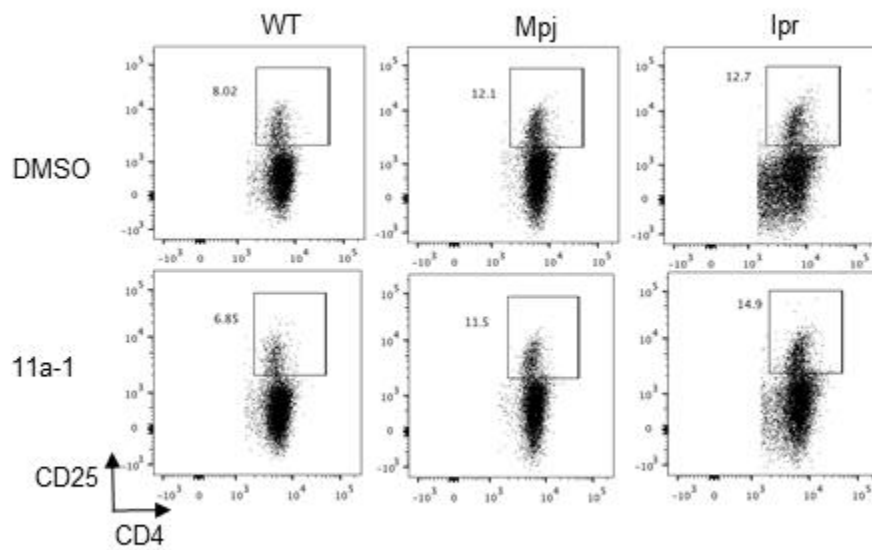

*Supplemental Figure 4. SHP2 activity does not affect regulatory T cells in MRL/lpr spleens.* Total splenocytes were isolated from 18 week-old WT, Mpj and lpr female mice treated for 6 weeks with vehicle or 11a-1 (7.5 mg/kg/day) and assayed by flow cytometry for T regulatory cells (CD4<sup>+</sup>CD25<sup>+</sup>), gated at CD3<sup>+</sup>.

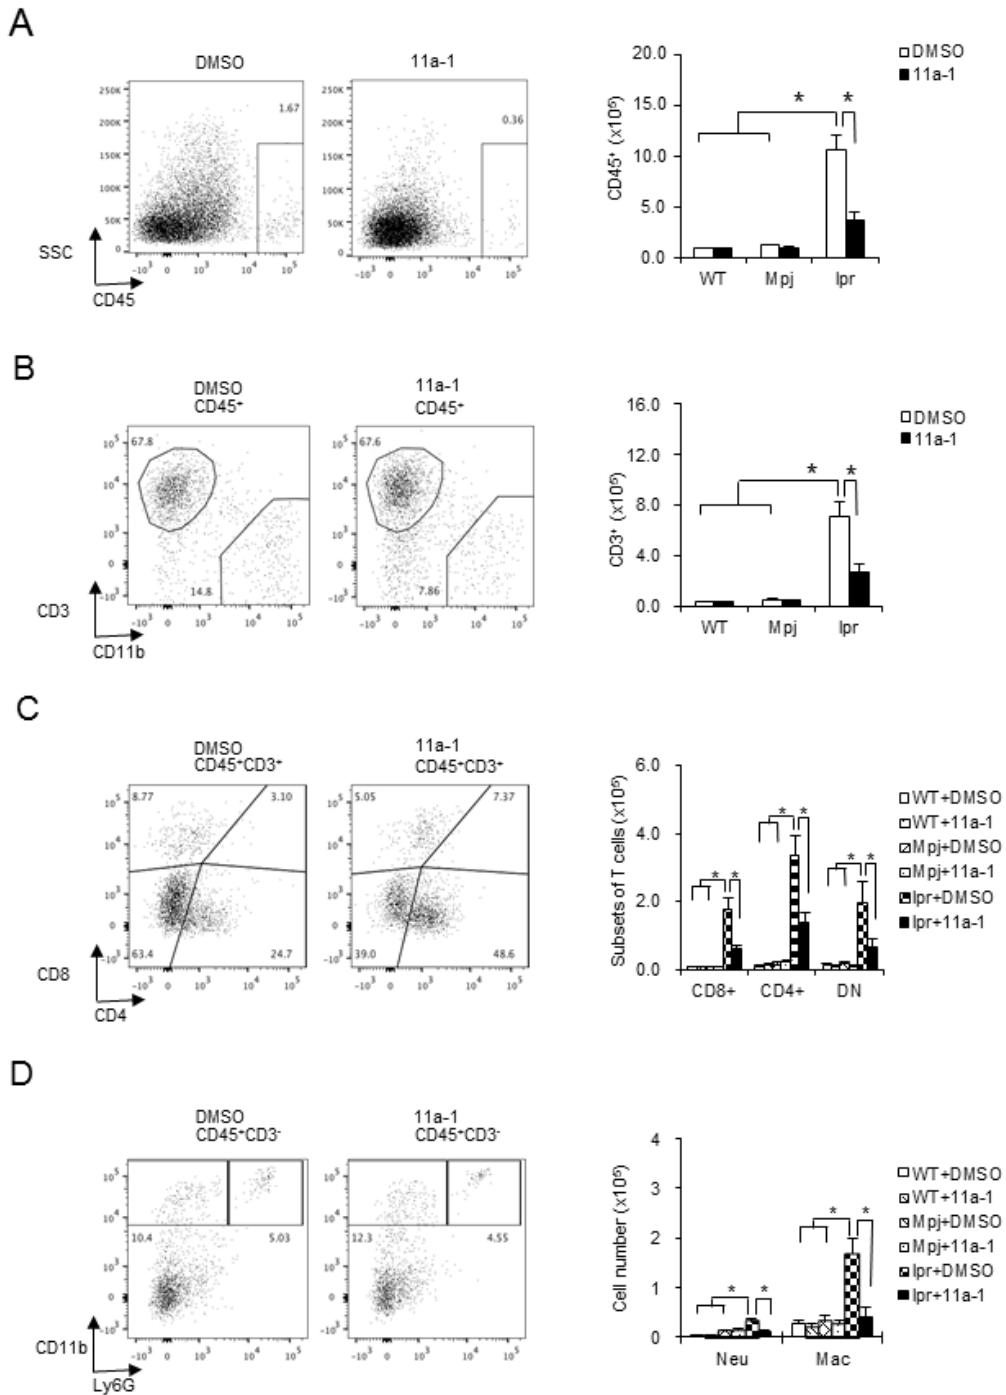

**Supplemental Figure 5. The SHP2 inhibitor reduces inflammatory cell infiltration in MRL/*lpr* kidneys.** Kidney cells isolated from 18 week-old WT, MPJ and *lpr* female mice treated for 6 weeks with vehicle or 11a-1 (7.5 mg/kg/day) were assayed by flow cytometry for **A.** leukocytes (CD45<sup>+</sup>), **B.** T cells (CD3<sup>+</sup>), gated at CD45<sup>+</sup>, **C.** the subset of T cells: CD4<sup>+</sup>, CD8<sup>+</sup> and CD4<sup>-</sup>CD8<sup>+</sup>, gated at CD45<sup>+</sup>CD3<sup>+</sup>, and **D.** macrophages and neutrophils (CD11b<sup>+</sup>Ly6G<sup>-</sup>, CD11b<sup>+</sup>Ly6G<sup>+</sup>), gated at CD45<sup>+</sup>CD3<sup>+</sup>.

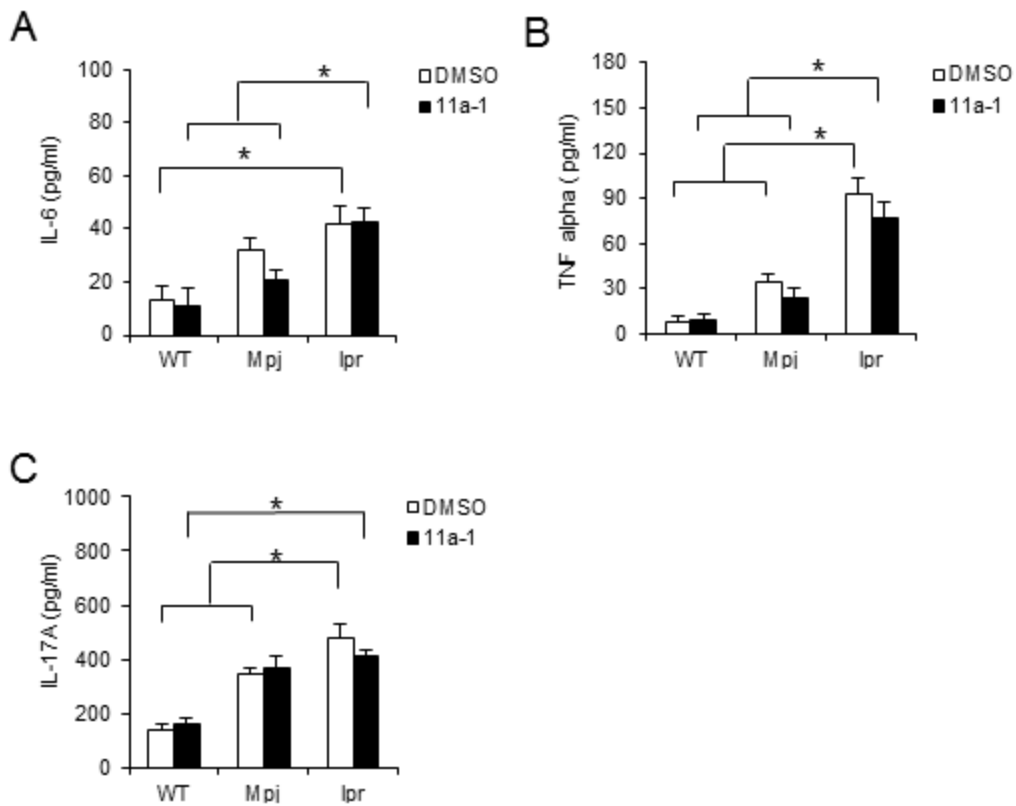

**Supplemental Figure 6. The SHP2 inhibitor does not reduce IL-6, TNF $\alpha$  or IL-17A/A cytokine levels in MRL/*lpr* mice.** Circulating levels of **A.** Interleukin-6 (IL-6), **B.** Tumor necrosis factor alpha (TNF $\alpha$ ), or **C.** Interleukin 17A homodimer (IL-17A/A) were measured in serum collected from 18 week-old WT, Mpi and *lpr* female mice treated for 6 weeks with vehicle or 11a-1 (7.5 mg/kg/day). N=7-8 mice/group; \*p<0.05, where p values were derived from two-way ANOVA with Holm-Sidak post-test when ANOVA was significant.
